# Supplementary material for: Syntrophy via Interspecies H2 Transfer between Christensenella and Methanobrevibacter Underlies Their Global Cooccurrence in the Human Gut
Source: PubMed Central journal article supplement (PMC7002349; doi:10.1128/mbio.03235-19), 2020-02-04

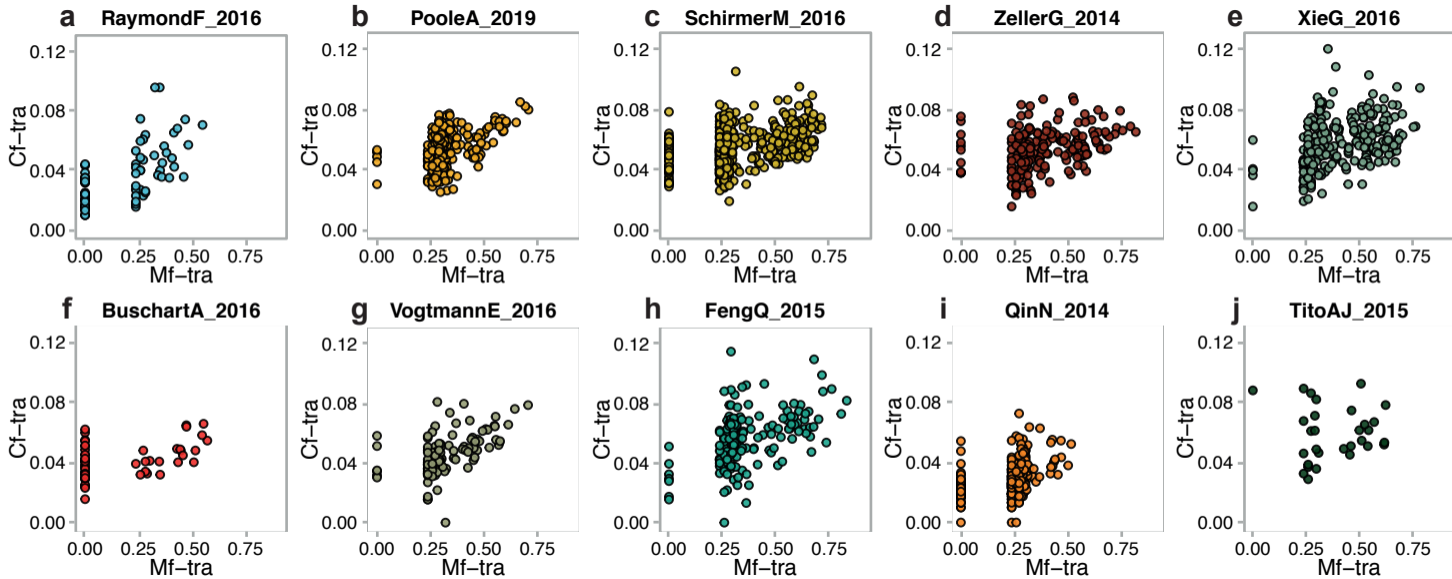

Supplement: mBio.03235-19-sf001.pdf [file mBio.03235-19-sf001.pdf]
