# Supplementary material for: Syntrophy via Interspecies H2 Transfer between Christensenella and Methanobrevibacter Underlies Their Global Cooccurrence in the Human Gut
Source: PubMed Central journal article supplement (PMC7002349; doi:10.1128/mbio.03235-19), 2020-02-04
Supplement: mBio.03235-19-sf004.pdf [file mBio.03235-19-sf004.pdf]

Batch S1: N<sub>2</sub> - 2 barBatch S2: N<sub>2</sub> - 2 barBatch S3: N<sub>2</sub> - atmBatch S4: N<sub>2</sub> - atm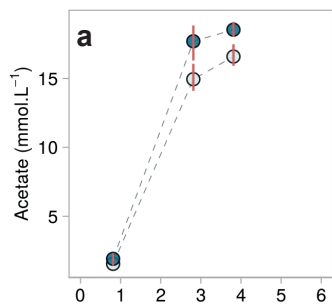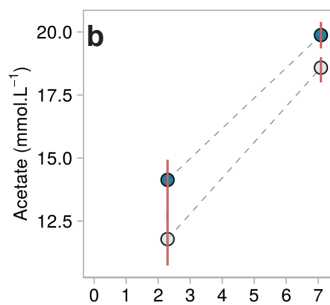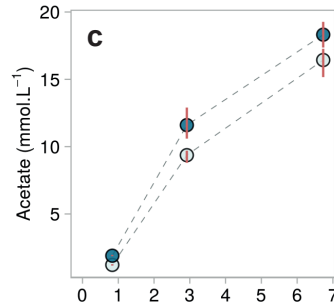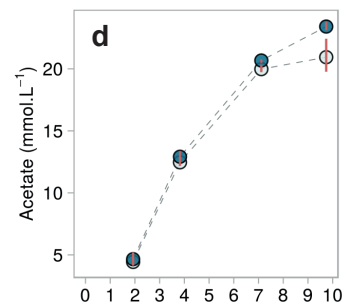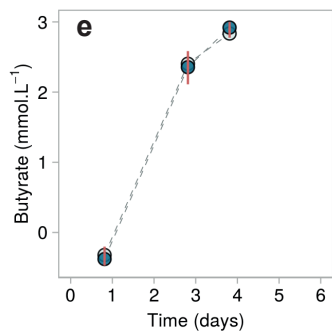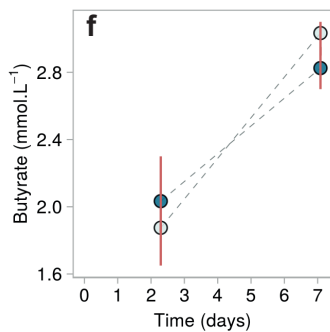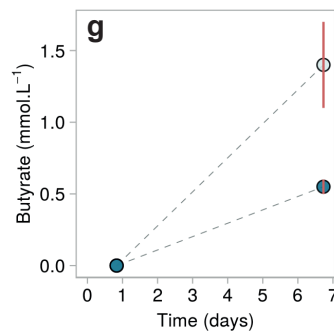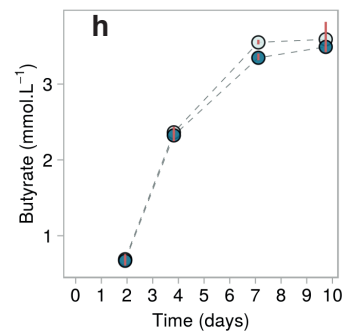

○ *C. minuta* ● *M. smithii* / *C. minuta*

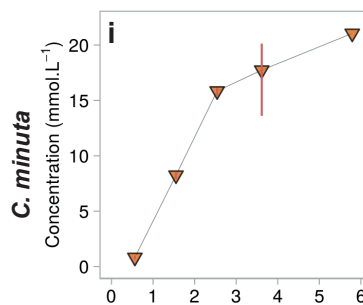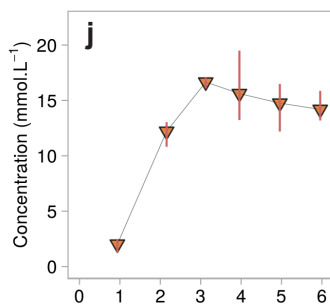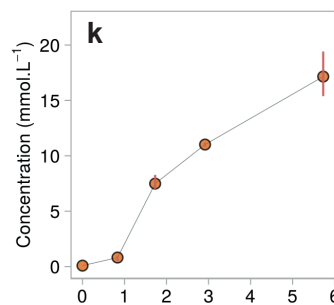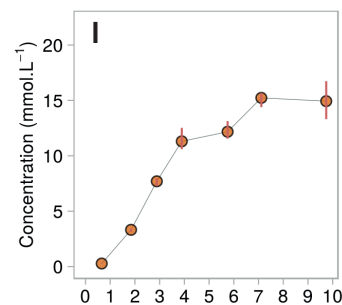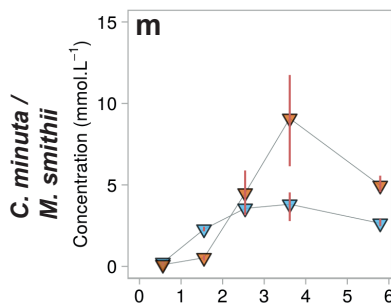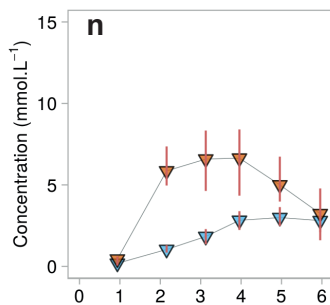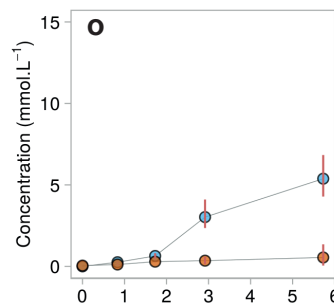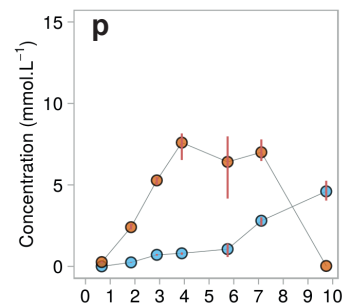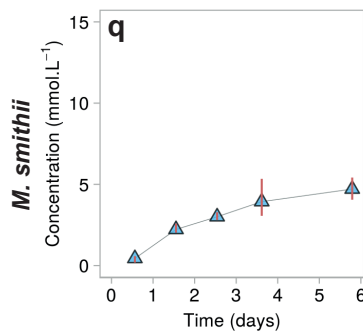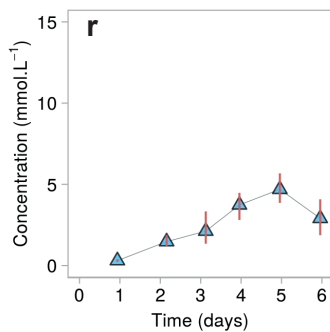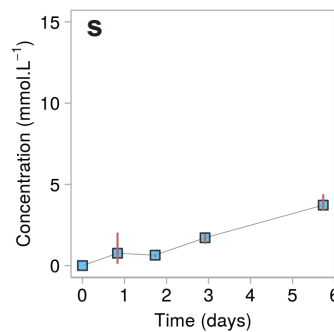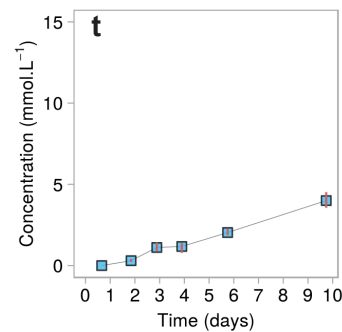

Gas ● H<sub>2</sub> ● CH<sub>4</sub> Conditions ▽ N<sub>2</sub> - 2 bar ○ N<sub>2</sub> - atm △ H<sub>2</sub> - 2 bar □ H<sub>2</sub> - atm
