# Supplementary material for: Syntrophy via Interspecies H2 Transfer between Christensenella and Methanobrevibacter Underlies Their Global Cooccurrence in the Human Gut
Source: PubMed Central journal article supplement (PMC7002349; doi:10.1128/mbio.03235-19), 2020-02-04
Supplement: mBio.03235-19-st001.pdf [file mBio.03235-19-st001.pdf]

| Batch            | Pressure, bar | Headspace composition, 80:20 % v/v | Culture                                        |
|------------------|---------------|------------------------------------|------------------------------------------------|
| 1                | 2.0           | N <sub>2</sub> :CO <sub>2</sub>    | <i>C. minuta</i>                               |
|                  |               |                                    | <i>M. smithii</i> / <i>C. minuta</i>           |
|                  |               |                                    | <i>B. thetaiotaomicron</i>                     |
|                  |               |                                    | <i>M. smithii</i> / <i>B. thetaiotaomicron</i> |
|                  |               | negative control                   |                                                |
|                  |               | H <sub>2</sub> :CO <sub>2</sub>    | <i>M. smithii</i>                              |
| negative control |               |                                    |                                                |
| 2                | 0.98          | N <sub>2</sub> :CO <sub>2</sub>    | <i>C. minuta</i>                               |
|                  |               |                                    | <i>M. smithii</i> / <i>C. minuta</i>           |
|                  |               |                                    | negative control                               |
|                  |               | H <sub>2</sub> :CO <sub>2</sub>    | <i>M. smithii</i>                              |
|                  |               |                                    | negative control                               |
|                  |               |                                    | negative control                               |
| 3                | 2.0           | H <sub>2</sub> :CO <sub>2</sub>    | <i>C. minuta</i>                               |
|                  |               |                                    | <i>M. smithii</i> / <i>C. minuta</i>           |
|                  |               |                                    | <i>M. smithii</i>                              |
|                  |               |                                    | negative control                               |
| 4                | 0.98          | N <sub>2</sub> :CO <sub>2</sub>    | <i>C. massiliensis</i>                         |
|                  |               |                                    | <i>M. smithii</i> / <i>C. massiliensis</i>     |
|                  |               |                                    | <i>C. timonensis</i>                           |
|                  |               |                                    | <i>C. timonensis</i> / <i>M. smithii</i>       |
|                  |               |                                    | negative control                               |
|                  |               | H <sub>2</sub> :CO <sub>2</sub>    | <i>M. smithii</i>                              |
|                  |               |                                    | negative control                               |
