# Supplementary material for: Syntrophy via Interspecies H2 Transfer between Christensenella and Methanobrevibacter Underlies Their Global Cooccurrence in the Human Gut
Source: PubMed Central journal article supplement (PMC7002349; doi:10.1128/mbio.03235-19), 2020-02-04
Supplement: mBio.03235-19-st003.pdf [file mBio.03235-19-st003.pdf]

| <b>Designation and Reference</b>                                                                                                                                                                                                                                                                                                                         | <b>Number of samples</b> | <b>Country</b> | <b>BMI</b>               | <b>Age</b>      | <b>%♀</b> |
|----------------------------------------------------------------------------------------------------------------------------------------------------------------------------------------------------------------------------------------------------------------------------------------------------------------------------------------------------------|--------------------------|----------------|--------------------------|-----------------|-----------|
| Raymond_2016<br>Raymond F, Ouameur AA, Déraspe M, Iqbal N, Gingras H, Dridi B, Leprohon P, Plante P-L, Giroux R, Bérubé É, Frenette J, Boudreau DK, Simard J-L, Chabot I, Domingo M-C, Trottier S, Boissinot M, Huletsky A, Roy PH, Ouellette M, Bergeron MG, Corbeil J. 2016. ISME J 10:707–720                                                         | 72                       | CAN            | 23.97<br>(19.03 - 29.76) | 25<br>(21 - 35) | 54.17     |
| Buschart_2016<br>Heintz-Buschart A, May P, Laczny CC, Lebrun LA, Bellora C, Krishna A, Wampach L, Schneider JG, Hogan A, de Beaufort C, Wilmes P. 2016. Nat Microbiol 2:16180.                                                                                                                                                                           | 51                       | LUX            | 24.68<br>(14.01 - 37.21) | 33<br>(5 - 62)  | 62.75     |
| Poole_2019<br>Poole AC, Goodrich JK, Youngblut ND, Luque GG, Ruaud A, Sutter JL, Waters JL, Shi Q, El-Hadidi M, Johnson LM, Bar HY, Huson DH, Booth JG, Ley RE. 2019. Cell Host Microbe 25:553–564.e7.                                                                                                                                                   | 287                      | USA            | 23.04<br>(19.21 - 28.33) | 24<br>(19 - 34) | 66.9      |
| Vogtmann_2016<br>Vogtmann E, Hua X, Zeller G, Sunagawa S, Voigt AY, Hercog R, Goedert JJ, Shi J, Bork P, Sinha R. 2016. PLoS One 11:e0155362.                                                                                                                                                                                                            | 101                      | USA            | 25.12<br>(16.83 - 38.37) | 61<br>(31 - 89) | 27.72     |
| Schirmer_2016<br>Schirmer M, Smeekens SP, Vlamakis H, Jaeger M, Oosting M, Franzosa EA, Ter Horst R, Jansen T, Jacobs L, Bonder MJ, Kurilshikov A, Fu J, Joosten LAB, Zhernakova A, Huttenhower C, Wijmenga C, Netea MG, Xavier RJ. 2016. Cell 167:1125–1136.e8.                                                                                         | 456                      | NLD            | 22.7<br>(15.09 - 34.42)  | 28<br>(18 - 75) | 57.02     |
| Feng_2015<br>Feng Q, Liang S, Jia H, Stadlmayr A, Tang L, Lan Z, Zhang D, Xia H, Xu X, Jie Z, Su L, Li X, Li X, Li J, Xiao L, Huber-Schönauer U, Niederseer D, Xu X, Al-Aama JY, Yang H, Wang J, Kristiansen K, Arumugam M, Tilg H, Datz C, Wang J. 2015. Nat Commun 6:6528.                                                                             | 154                      | AUT            | 27.39<br>(17.99 - 43.58) | 67<br>(43 - 86) | 43.51     |
| Zeller_2014<br>Zeller G, Tap J, Voigt AY, Sunagawa S, Kultima JR, Costea PI, Amiot A, Böhm J, Brunetti F, Habermann N, Hercog R, Koch M, Luciani A, Mende DR, Schneider MA, Schrotz-King P, Tournigand C, Tran Van Nhieue J, Yamada T, Zimmermann J, Benes V, Kloor M, Ulrich CM, von Knebel Doeberitz M, Sobhani I, Bork P. 2014. Mol Syst Biol 10:766. | 194                      | FRA;<br>DEU    | 25.58<br>(15 - 40)       | 62<br>(25 - 90) | 40.72     |

|                                                                                                                                                                                                                                                                                                                                                 |     |             |                          |                 |       |
|-------------------------------------------------------------------------------------------------------------------------------------------------------------------------------------------------------------------------------------------------------------------------------------------------------------------------------------------------|-----|-------------|--------------------------|-----------------|-------|
| <p style="text-align: right;">Qin_2014</p> <p>Qin N, Yang F, Li A, Prifti E, Chen Y, Shao L, Guo J, Le Chatelier E, Yao J, Wu L, Zhou J, Ni S, Liu L, Pons N, Batto JM, Kennedy SP, Leonard P, Yuan C, Ding W, Chen Y, Hu X, Zheng B, Qian G, Xu W, Ehrlich SD, Zheng S, Li L. 2014. Nature 513:59–64.</p>                                      | 226 | CHN         | 22.25<br>(15.94 - 35.16) | 46<br>(18 - 78) | 33.63 |
| <p style="text-align: right;">Xie_2016</p> <p>Xie H, Guo R, Zhong H, Feng Q, Lan Z, Qin B, Ward KJ, Jackson MA, Xia Y, Chen X, Chen B, Xia H, Xu C, Li F, Xu X, Al-Aama JY, Yang H, Wang J, Kristiansen K, Wang J, Steves CJ, Bell JT, Li J, Spector TD, Jia H. 2016. Cell Syst 3:572–584.e3.</p>                                               | 250 | UK          | 25.75<br>(16.17 - 44.83) | 61<br>(35 - 79) | 100   |
| <p style="text-align: right;">Tito_2015</p> <p>Obregon-Tito AJ, Tito RY, Metcalf J, Sankaranarayanan K, Clemente JC, Ursell LK, Zech Xu Z, Van Treuren W, Knight R, Gaffney PM, Spicer P, Lawson P, Marin-Reyes L, Trujillo-Villarroel O, Foster M, Guija-Poma E, Troncoso-Corzo L, Warinner C, Ozga AT, Lewis CM. 2015. Nat Commun 6:6505.</p> | 30  | USA;<br>PER | 23.42<br>(14.05 - 31.53) | 28<br>(3 - 50)  | 50    |
